# Supplementary material for: The layered perovskite K2SrTa2O7: hydration and K+/H+ ion exchange
Source: Royal Society of Chemistry journal article supplement (doi:10.1039/b005755j), 2001-01-01
Supplement: b005755j.doc [file b005755j.doc]

c  16.0 Å

c = 24,0 Å

n = 3

b)

n = 2

ESI 1

a)

**ESI 1**: “Hypothetical” metastable 3-D perovskites A0.5BO3 with exotic ordering of vacancies (n = 2 to n = 3) : small black circles are relative to the A sites, fully occupy for n = 2, and with a vacancy rate of 1/4 for n = 3.


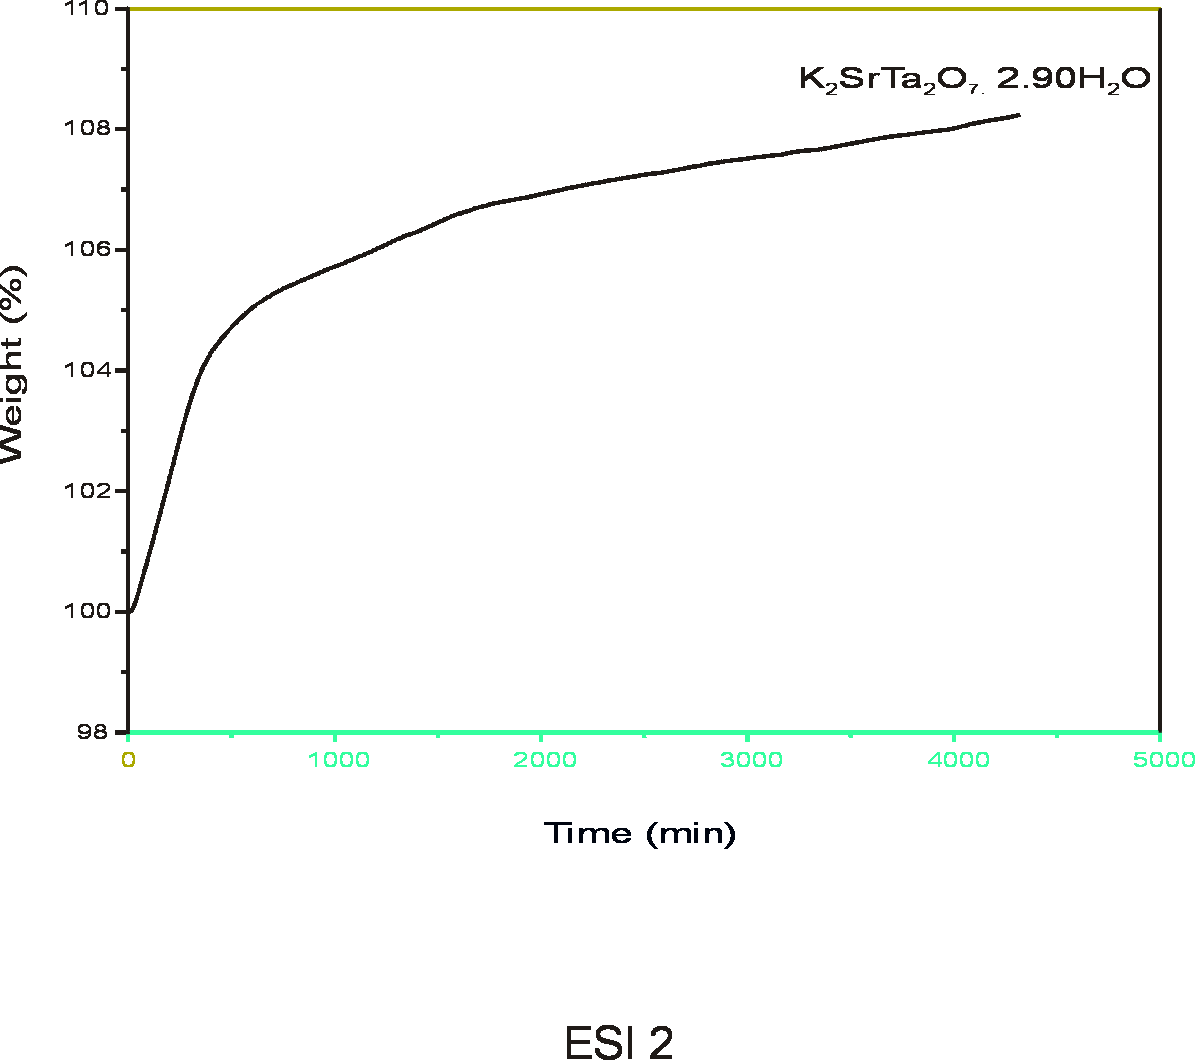


**ESI 2**:TGA curve for K2SrTa2O7. xH2O during the rehydration process (humidity rate : 70%).


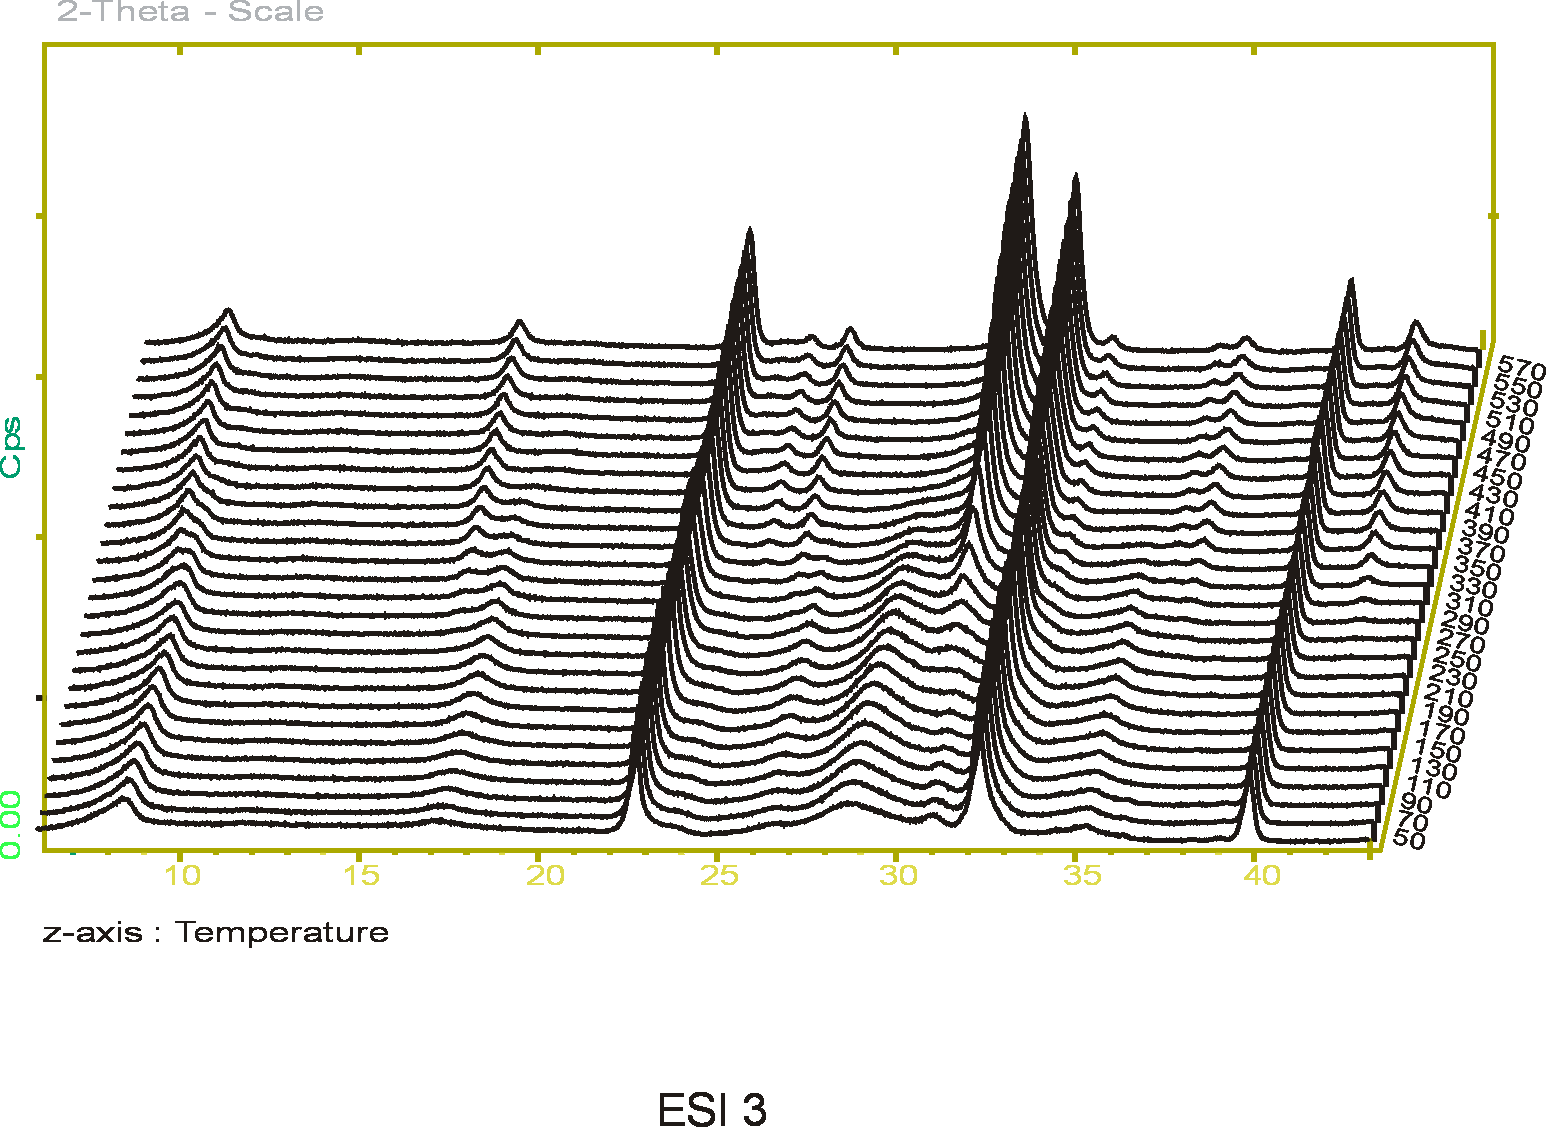


**ESI 3**:Thermal evolution of K2SrTa2O7. xH2O X-ray powder diffraction patterns between 50°C and 570°C.


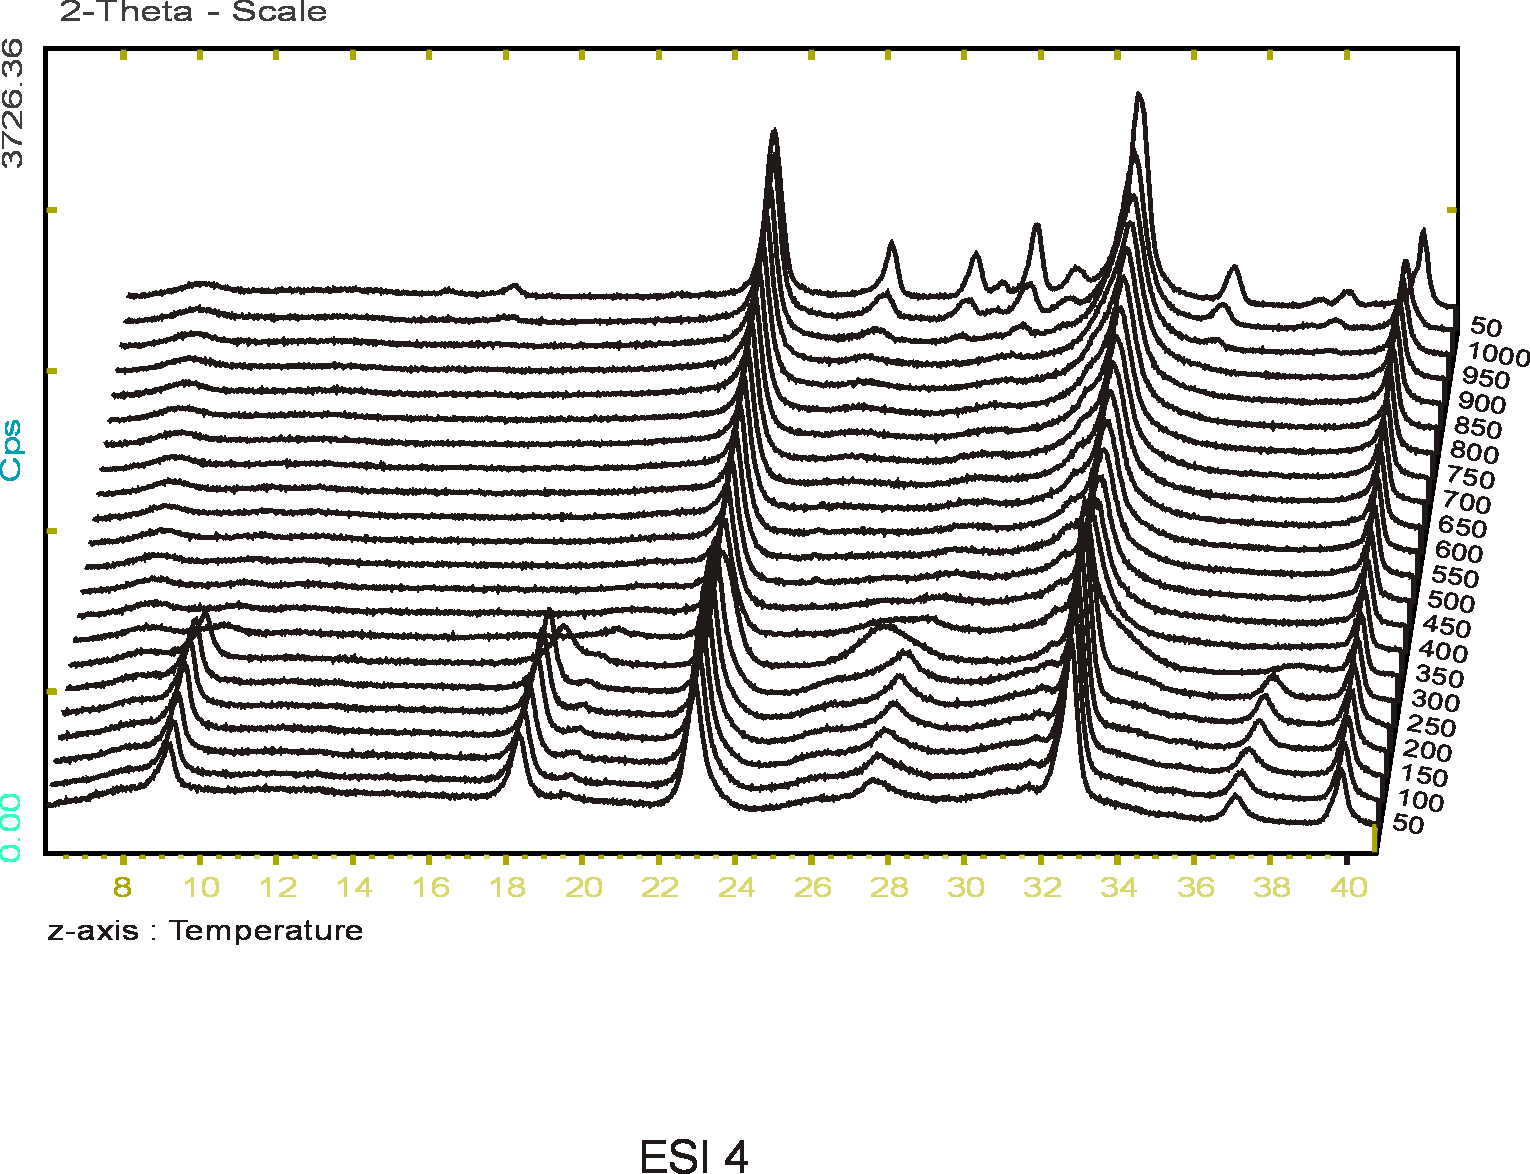


**ESI 4**: X-ray thermodiffractogram of H2SrTa2O7. xH2O between room temperature and 1000°C.
